# Supplementary material
Source: MDPI journal article supplement (https://www.mdpi.com/2673-8112/1/3/47)
Supplement: s1 [file s1]

Supplementary Materials

ARTICLE

## Self and Nonself Short Constituent Sequences of Amino Acids in the SARS-CoV-2 Proteome for Vaccine Development

Joji M. Otaki <sup>1,\*</sup>, Wataru Nakasone <sup>2</sup> and Morikazu Nakamura <sup>2</sup>

<sup>1</sup> The BCPH Unit of Molecular Physiology, Department of Chemistry, Biology and Marine Science, University of the Ryukyus, Okinawa 903-0213, Japan

<sup>2</sup> Computer Science and Intelligent Systems Unit, Department of Information and Engineering, Faculty of Engineering, University of the Ryukyus, Okinawa 903-0213, Japan

\*e-mail: [otaki@sci.u-ryukyu.ac.jp](mailto:otaki@sci.u-ryukyu.ac.jp)

Supplementary Materials and Methods

Supplementary Tables S1, S2, S3, and S4

## Supplementary Materials and Methods

**Variant proteomes.** We first downloaded 93 variant proteomes in addition to the reference proteome (ASM985889v3). Among them, the 67 variant proteomes that were analyzed for proteome-wide mutations were as follows: ASM993789v1, ASM993791v1, ASM993792v1, ASM993793v1, ASM993794v1, ASM1153697v1, ASM1153700v1, ASM1153701v1, ASM1153706v1, ASM1153707v1, ASM1153708v1, ASM1153713v1, ASM1153714v1, ASM1153722v1, ASM1153723v1, ASM1153726v1, ASM1153735v1, ASM1153736v1, ASM1153742v1, ASM1153745v1, ASM1153747v1, ASM1153750v1, ASM1154508v2, ASM1154509v2, ASM1154512v2, ASM1154513v1, ASM1154528v2, ASM1154529v1, ASM1154532v2, ASM1154533v2, ASM1154534v1, ASM1154535v1, ASM1154542v1, ASM1154545v1, ASM1154548v1, ASM1154550v1, ASM1154553v1, ASM1154555v1, ASM1174199v1, ASM1174200v2, ASM1174201v1, ASM1174 202v1, ASM1174203v1, ASM1153751v1, ASM1153752v2, ASM1153755v1, ASM1153756v1, ASM1153761v1, ASM1153762v1, ASM1153769v1, ASM1153770v1, ASM1153771v1, ASM1153781v1, ASM1153782v2, ASM1153783v2, ASM1153786v2, ASM1153789v2, ASM1153794v2, ASM1153797v2, ASM1153798v2, ASM1153802v2, ASM1153805v2, ASM1153810v2, ASM1154497v2, ASM1154502v2, ASM1154506v2, ASM1154507v2.

Other 26 proteomes that were not analyzed further due to insertions and deletions were as follows: ASM993788v1, ASM993790v1, ASM993805v1, ASM993806v1, ASM994842v1, ASM994846v1, ASM994849v1, ASM994852v1, ASM994855v1, ASM1153693v1, ASM1153715v1, ASM1153729v1, ASM1153732v1, ASM1153739v1, ASM1153746v1, ASM1153778v1, ASM1153801v2, ASM1154503v2, ASM1154516v1, ASM1154523v1, ASM1154524v1, ASM1154527v1, ASM1154549v1, ASM1154554v1, ASM1308859v1, ViralProj15500.

**Point mutations in the spike protein.** The point mutations that were analyzed for the spike mutations in this study were as follows [46–49]: L5F, L18F, D80A, N122Q, N165Q, D215G, N234Q, Q239K, R246I, N331Q, V341I, N343Q, D364Y, V367F, D405V, Q409E, Q414E/P, K417N, I434K, A435S, S438F, N439K, L452R, K458R, D467V, I468F/T, I472V, A475V, V483A, E484K, F490L, P491R, N501Y, V503F, Y508H, R509K, V510L, P521S, A522V, A570D, D614G, Q675H, P681H, A701V, N709Q, T716I, N717Q, T719A, N801Q, A831V, D839Y, D936Y, S939F, S943T, S982A, N1074Q, D1118H, P1263L.

**Table S1. Number of self and nonself SCSs in the SARS-CoV-2 proteins.**

|                         | <b>Number of<br/>Self SCS</b> | <b>Number of<br/>Nonself SCS</b> | <b>Number of<br/>Total SCS</b> | <b>Nonself SCS<br/>[%]</b> |
|-------------------------|-------------------------------|----------------------------------|--------------------------------|----------------------------|
| <b>ORF1ab</b>           | 6450                          | 642                              | 7092                           | 9.05                       |
| <b>Spike (S)</b>        | 1172                          | 97                               | 1269                           | 7.64                       |
| <b>ORF3a</b>            | 240                           | 31                               | 271                            | 11.44                      |
| <b>Envelope (E)</b>     | 64                            | 7                                | 71                             | 9.86                       |
| <b>Membrane (M)</b>     | 203                           | 15                               | 218                            | 6.88                       |
| <b>ORF6</b>             | 51                            | 6                                | 57                             | 10.53                      |
| <b>ORF7a</b>            | 111                           | 6                                | 117                            | 5.13                       |
| <b>ORF8</b>             | 104                           | 13                               | 117                            | 11.11                      |
| <b>Nucleocapsid (N)</b> | 386                           | 29                               | 415                            | 6.99                       |
| <b>ORF10</b>            | 28                            | 6                                | 34                             | 17.65                      |
| <b>Total</b>            | 8809                          | 852                              | 9661                           | 8.82                       |

**Table S2. Distribution of nonself SCS clusters in the SARS-CoV-2 proteins.**

| aa   | ORF1ab | S  | ORF3a | E | M | OR6 | OR7a | ORF8 | N | ORF10 | Total |
|------|--------|----|-------|---|---|-----|------|------|---|-------|-------|
| 5aa  | 152    | 23 | 6     | 0 | 4 | 2   | 1    | 5    | 4 | 0     | 198   |
| 6aa  | 31     | 6  | 1     | 0 | 0 | 1   | 1    | 1    | 1 | 0     | 42    |
| 7aa  | 24     | 1  | 1     | 0 | 0 | 0   | 0    | 0    | 4 | 0     | 30    |
| 8aa  | 21     | 5  | 1     | 0 | 1 | 1   | 1    | 0    | 1 | 1     | 32    |
| 9aa  | 27     | 3  | 1     | 1 | 0 | 0   | 0    | 0    | 1 | 1     | 34    |
| 10aa | 13     | 1  | 0     | 1 | 1 | 0   | 0    | 0    | 0 | 0     | 16    |
| 11aa | 8      | 2  | 0     | 0 | 0 | 0   | 0    | 0    | 1 | 0     | 11    |
| 12aa | 6      | 1  | 0     | 0 | 1 | 0   | 0    | 0    | 1 | 0     | 9     |
| 13aa | 1      | 0  | 0     | 0 | 0 | 0   | 0    | 1    | 0 | 0     | 2     |
| 14aa | 6      | 0  | 0     | 0 | 0 | 0   | 0    | 0    | 0 | 0     | 6     |
| 15aa | 6      | 2  | 0     | 0 | 0 | 0   | 0    | 0    | 0 | 0     | 8     |
| 16aa | 2      | 1  | 0     | 0 | 0 | 0   | 0    | 0    | 0 | 0     | 3     |
| 17aa | 1      | 0  | 1     | 0 | 0 | 0   | 0    | 0    | 0 | 0     | 2     |
| 18aa | 1      | 0  | 1     | 0 | 0 | 0   | 0    | 0    | 0 | 0     | 2     |
| 19aa | 0      | 0  | 0     | 0 | 0 | 0   | 0    | 0    | 0 | 0     | 0     |
| 20aa | 1      | 0  | 0     | 0 | 0 | 0   | 0    | 0    | 0 | 0     | 1     |
| 21aa | 1      | 0  | 0     | 0 | 0 | 0   | 0    | 0    | 0 | 0     | 1     |
| 22aa | 0      | 0  | 0     | 0 | 0 | 0   | 0    | 0    | 0 | 0     | 0     |
| 23aa | 0      | 0  | 0     | 0 | 0 | 0   | 0    | 0    | 0 | 0     | 0     |
| 24aa | 0      | 0  | 0     | 0 | 0 | 0   | 0    | 0    | 0 | 0     | 0     |
| 25aa | 0      | 0  | 0     | 0 | 0 | 0   | 0    | 0    | 0 | 0     | 0     |
| 26aa | 0      | 0  | 0     | 0 | 0 | 0   | 0    | 0    | 0 | 0     | 0     |
| 27aa | 1      | 0  | 0     | 0 | 0 | 0   | 0    | 0    | 0 | 0     | 1     |
| ≥6aa | 150    | 22 | 6     | 2 | 3 | 2   | 2    | 2    | 9 | 2     | 200   |

5aa SCSs here are solitary SCSs, which do not form any nonself cluster with other adjacent nonself SCSs.

**Table S3. Self-nonsel status changes of SCSs due to point mutations in 68 variant proteomes of SARS-CoV-2.**

| Variant proteome | Serial SCS site number | Protein          | Status change site | Original SCS (RefSeq) | Variant SCS | Self/nonsel change |
|------------------|------------------------|------------------|--------------------|-----------------------|-------------|--------------------|
| ASM993794v1      | 3606 (1-3606)          | ORF1ab           | L3606F             | LYENA                 | FYENA       | 0 to 1             |
| ASM1153713v1     | 2705 (1-2705)          | ORF1ab           | K2705K             | KSHNI                 | KSHSI       | 1 to 0             |
| ASM1153723v1     | 901 (1-901)            | ORF1ab           | S901S              | SMATY                 | SIATY       | 0 to 1             |
| ASM1153723v1     | 902 (1-902)            | ORF1ab           | M902I              | MATYY                 | IATYY       | 1 to 0             |
| ASM1153723v1     | 8485 (3-124)           | ORF3a            | I124I              | IMRLW                 | IMRLL       | 1 to 0             |
| ASM1153723v1     | 8489 (3-128)           | ORF3a            | W128L              | WLCWK                 | LLCWK       | 1 to 0             |
| ASM1153723v1     | 8608 (3-247)           | ORF3a            | H247H              | HTIDG                 | HTIDV       | 1 to 0             |
| ASM1153736v1     | 3073 (1-3073)          | ORF1ab           | E3073E             | EYSHV                 | EYSYV       | 1 to 0             |
| ASM1153745v1     | 7888 (2-796)           | Spike (S)        | D796D              | DFGGF                 | DCGGF       | 0 to 1             |
| ASM1153762v1     | 3606 (1-3606)          | ORF1ab           | L3606F             | LYENA                 | FYENA       | 0 to 1             |
| ASM1153771v1     | 1836 (1-1836)          | ORF1ab           | Y1836Y             | YKHIT                 | YKHII       | 0 to 1             |
| ASM1153810v2     | 1856 (1-1856)          | ORF1ab           | S1856S             | SSEYK                 | SSEYN       | 0 to 1             |
| ASM1153810v2     | 1858 (1-1858)          | ORF1ab           | E1858E             | EYKGP                 | EYNGP       | 0 to 1             |
| ASM1153810v2     | 1859 (1-1859)          | ORF1ab           | Y1859Y             | YKGPI                 | YNGPI       | 0 to 1             |
| ASM1154548v1     | 5826 (1-5826)          | ORF1ab           | R5826R             | RNPAW                 | RNLAW       | 0 to 1             |
| ASM1154548v1     | 5827 (1-5827)          | ORF1ab           | N5827N             | NPAWR                 | NLAWR       | 1 to 0             |
| ASM1154548v1     | 5863 (1-5863)          | ORF1ab           | S5863S             | SEYDY                 | SECDY       | 0 to 1             |
| ASM1174201v1     | 9552 (9-340)           | Nucleocapsid (N) | D340D              | DDKDP                 | DDKVP       | 0 to 1             |
| ASM1174202v1     | 1607 (1-1607)          | ORF1ab           | I1607V             | IKPHN                 | VKPHN       | 1 to 0             |

Redundant sites in plural variant proteomes are not included.

Status change site shows the first aa of SCS. For example, K2705K indicates that KSHNI changed to KSHSI.

Self and nonself SCSs are indicated by 0 and 1, respectively.

**Table S4. Self-nonsel status changes of SCSs due to point mutations in the spike protein.**

| Status change site | Mutation site | Original SCS<br>(RefSeq) | Variant SCS | Self/nonsel<br>change |
|--------------------|---------------|--------------------------|-------------|-----------------------|
| <b>C15C</b>        | L18F          | CVNLT                    | CVNFT       | 0 to 1                |
| <b>R78R</b>        | D80A          | RFDNP                    | RFANP       | 0 to 1                |
| <b>A163A</b>       | N165Q         | ANNCT                    | ANQCT       | 0 to 1                |
| <b>N164N</b>       | N165Q         | NNCTF                    | NQCTF       | 0 to 1                |
| <b>P230P</b>       | N234Q         | PIGIN                    | PIGIQ       | 1 to 0                |
| <b>F338F</b>       | V341I         | FGEVF                    | FGEIF       | 0 to 1                |
| <b>C361C</b>       | D364Y         | CVADY                    | CVAYY       | 1 to 0                |
| <b>V367F</b>       | V367F         | VLYNS                    | FLYNS       | 0 to 1                |
| <b>G431G</b>       | I434K         | GCVIA                    | GCVKA       | 0 to 1                |
| <b>C432C</b>       | A435S         | CVIAW                    | CVISW       | 0 to 1                |
| <b>C432C</b>       | I434K         | CVIAW                    | CVKAW       | 0 to 1                |
| <b>V433V</b>       | A435S         | VIAWN                    | VISWN       | 1 to 0                |
| <b>V433V</b>       | I434K         | VIAWN                    | VKAWN       | 1 to 0                |
| <b>I434I</b>       | S438F         | IAWNS                    | IAWNF       | 0 to 1                |
| <b>A435S</b>       | A435S         | AWNSN                    | SWNSN       | 1 to 0                |
| <b>A435A</b>       | N439K         | AWNSN                    | AWNSK       | 1 to 0                |
| <b>Y449Y</b>       | L452R         | YNYLY                    | YNYRY       | 0 to 1                |
| <b>C484C</b>       | V483A         | CNGVE                    | CNGAG       | 0 to 1                |
| <b>E484K</b>       | E484K         | EGFNC                    | KGFNC       | 0 to 1                |
| <b>F486F</b>       | F490L         | FNCYF                    | FNCYL       | 1 to 0                |
| <b>N487N</b>       | F490L         | NCYFP                    | NCYLP       | 0 to 1                |
| <b>Q498Q</b>       | N501Y         | QPTNG                    | QPTYG       | 0 to 1                |
| <b>N501Y</b>       | N501Y         | NGVGY                    | YGVGY       | 0 to 1                |
| <b>C671C</b>       | Q675H         | CASYQ                    | CASYH       | 0 to 1                |
| <b>Y674Y</b>       | Q675H         | YQTQT                    | YHTQT       | 1 to 0                |
| <b>Q675H</b>       | Q675H         | QTQTN                    | HTQTN       | 1 to 0                |
| <b>Q677Q</b>       | P681H         | QTNSP                    | QTNSH       | 0 to 1                |
| <b>T678T</b>       | P681H         | TNSPR                    | TNSHR       | 0 to 1                |
| <b>A706A</b>       | N709Q         | AYSNN                    | AYSQN       | 0 to 1                |
| <b>I714I</b>       | N717Q         | IPTNF                    | IPTQF       | 0 to 1                |
| <b>A831V</b>       | A831V         | AGFIK                    | VGFIK       | 0 to 1                |
| <b>K1073K</b>      | N1074Q        | KNFTT                    | KQFTT       | 1 to 0                |
| <b>I1115I</b>      | D1118H        | ITTDN                    | ITTHN       | 0 to 1                |
| <b>T1116T</b>      | D1118H        | TTDNT                    | TTHNT       | 0 to 1                |
| <b>T1117T</b>      | D1118H        | TDNTF                    | THNTF       | 0 to 1                |
| <b>D1118H</b>      | D1118H        | DNTFV                    | HNTFV       | 0 to 1                |

Self and nonself SCSs are indicated by 0 and 1, respectively.
